# Supplementary material
Source: publisher figshare collection journal article supplement (https://acs.figshare.com/ndownloader/files/22762637)
Supplement: Supplementary file 1 [file 22762637]

**$\alpha$ -Synuclein regulates iron homeostasis via preventing parkin-mediated  
DMT1 ubiquitylation in Parkinson's disease models**

**Mingxia Bi, Xixun Du, Qian Jiao, Zhiguo Liu, Hong Jiang\***

Department of Physiology, Shandong Provincial Key Laboratory of Pathogenesis and Prevention of Neurological Disorders and State Key Disciplines: Physiology, School of Basic Medicine, Medical College, Qingdao University, Qingdao, China

**\*Correspondence:** Hong Jiang

Ph.D., Professor

State Key Discipline: Physiology,

Medical College of Qingdao University, Qingdao, 266071, China

Tel: 86-532-82991025

Email: hongjiang@qdu.edu.cn

Supporting Information

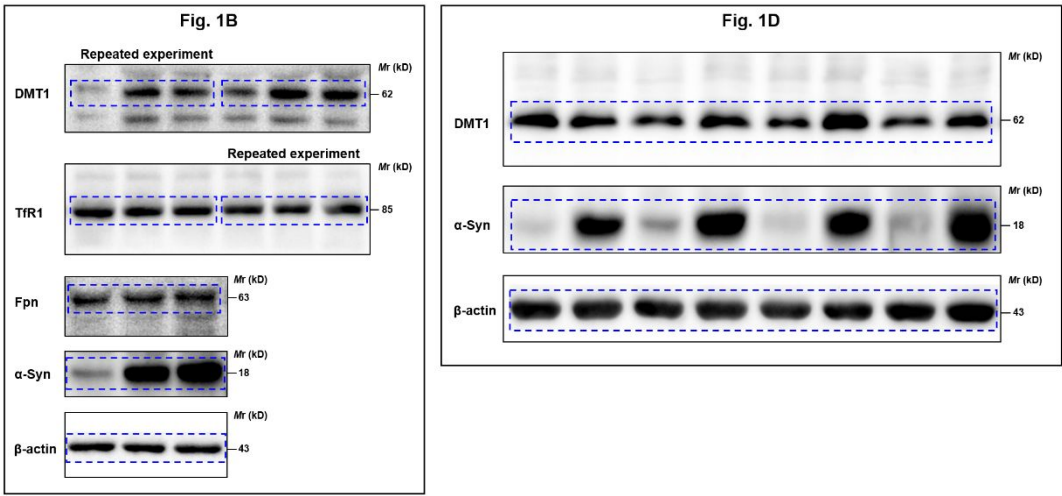

Fig. S1 Uncropped images of blots in Figure 1

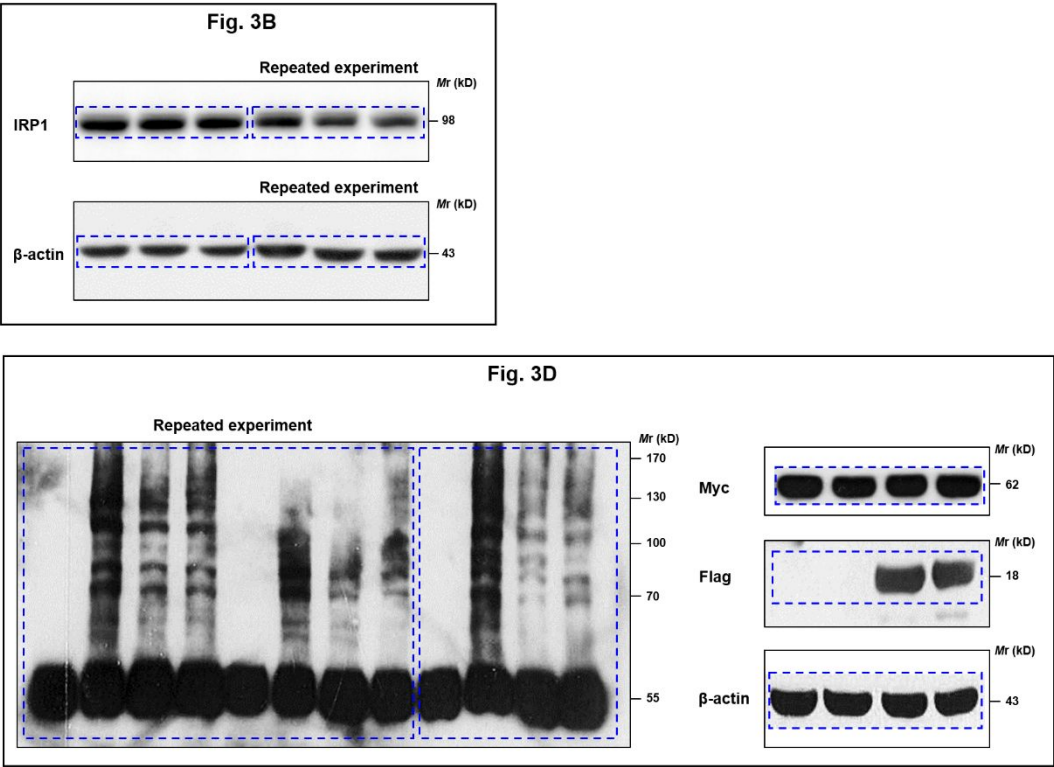

Fig. S2 Uncropped images of blots in Figure 3

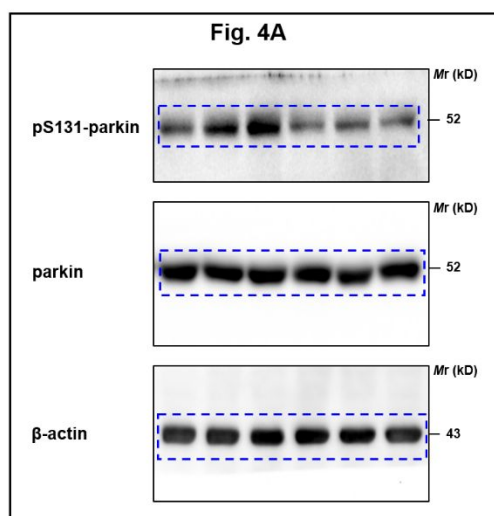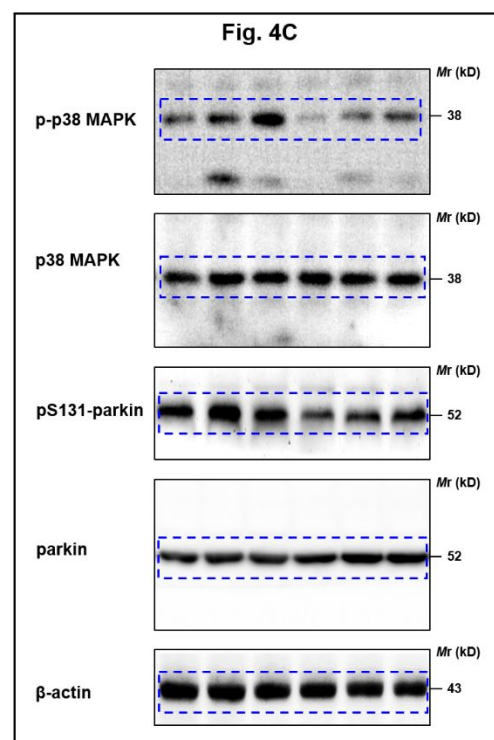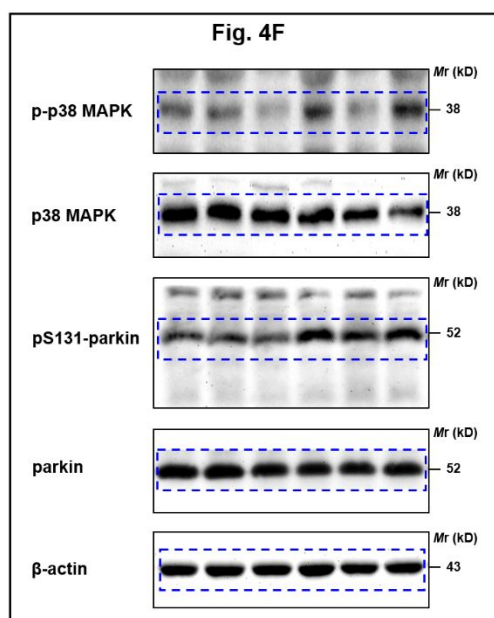

Fig. S3 Uncropped images of blots in Figure 4

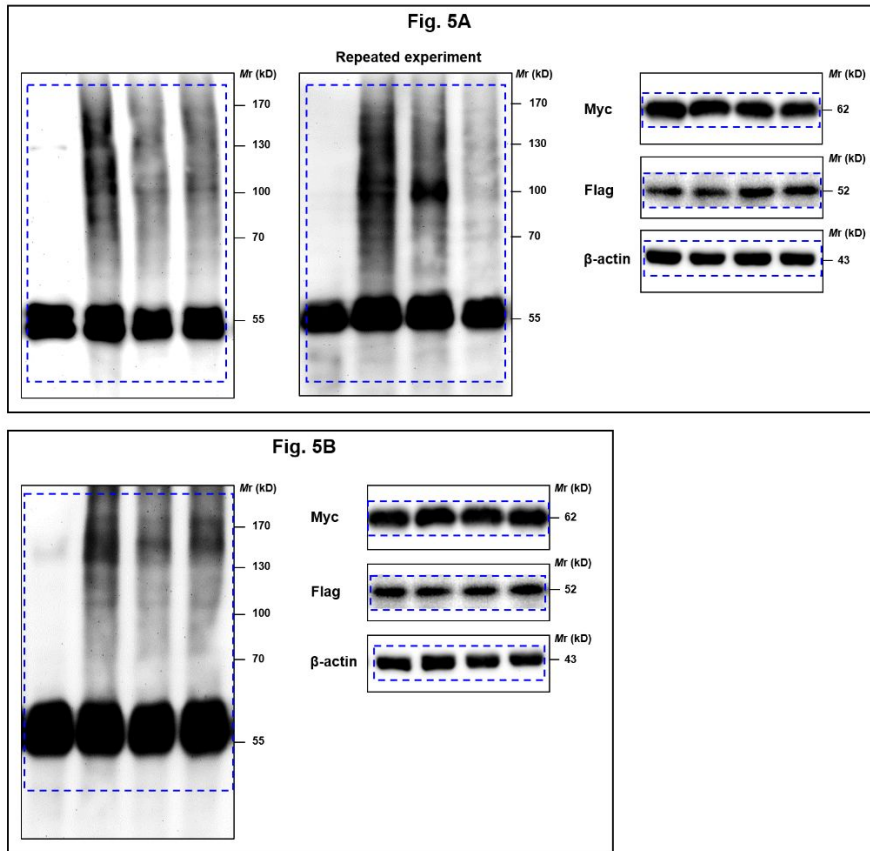

Fig. S4 Uncropped images of blots in Figure 5

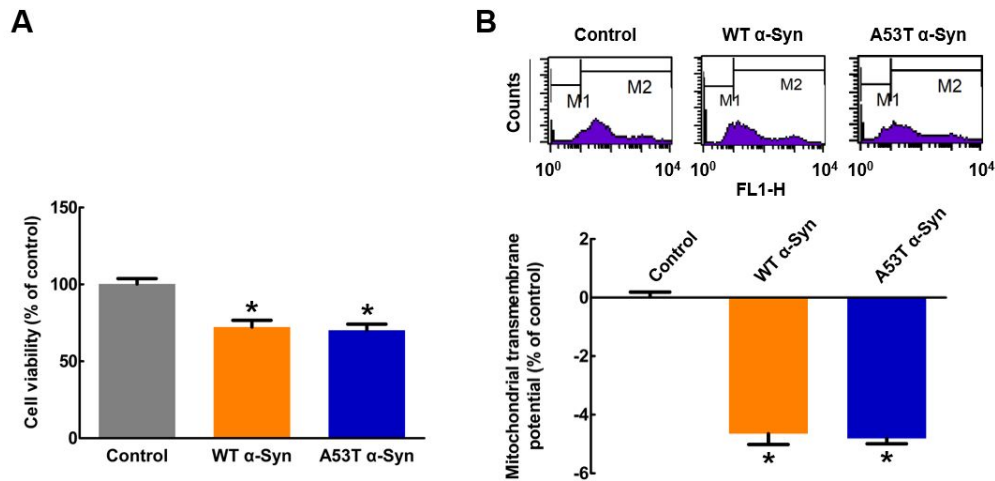

Fig. S5 Effects of  $\alpha$ -Syn overexpression on cell viability and  $\Delta\Psi_m$  in SH-SY5Y cells  
SH-SY5Y cells were transfected with WT  $\alpha$ -Syn or A53T  $\alpha$ -Syn, respectively. (A) Cell viability was determined by MTT assay. (B)  $\Delta\Psi_m$  was measured by flow cytometry. A significant decrease in cell viability and  $\Delta\Psi_m$  were observed in response to  $\alpha$ -Syn. \* $P$ <0.05, compared with the control group.  $n = 6$ .
